# Supplementary material
Source: PubMed Central journal article supplement (PMC3749246)
Supplement: NIHMS501019-supplement-01.pdf [file NIHMS501019-supplement-01.pdf]

## **Supplemental Information for:**

### **Proteotoxic stress induces a cell cycle arrest by stimulating Lon to degrade the replication initiator DnaA**

Kristina Jonas, Jing Liu, Peter Chien and Michael T. Laub

#### **Content:**

Supplemental Figure 1, relates to Figure 2

Supplemental Figure 2, relates to Figure 3

Supplemental Figure 3, relates to Figure 3

Supplemental Figure 4, relates to Figure 5

Supplemental Figure 5, relates to Figure 6

Supplemental Figure Legends

Supplemental Experimental Procedures

Supplemental Table 1 – Suppressor mutations

Supplemental Table 2 – Strains and plasmids

Supplemental Table 3 – Primers

Supplemental Table 4 – Microarray gene expression data

Supplemental References

## Supplemental Figure Legends

**Figure S1. Prolonged depletion of DnaK/J affects DnaA and RpoA synthesis.** Western blots and <sup>35</sup>S-labeling experiments showing steady-state levels and synthesis rates of DnaA and RpoA upon DnaK/J depletion. The DnaK/J depletion strain was grown in M2G minimal medium with xylose and then shifted to M2G without xylose to deplete DnaK/J. For monitoring protein synthesis, cultures were labeled for 10 min with <sup>35</sup>S-methionine at the indicated time points followed by immunoprecipitation of DnaA or RpoA with specific antisera. Samples for Western blotting were taken from the same culture at the same time points and probed with DnaK, DnaA or RpoA antiserum, respectively. Band intensities were quantified and plotted; in the case of <sup>35</sup>S-DnaA the means from two independent experiments are shown. The results show that DnaA and RpoA synthesis decreased similarly between 10 and 14 hours. DnaA steady-state levels started to drop before 10 hours of DnaK/J depletion, while RpoA protein remained at high levels, demonstrating that the removal of DnaA protein upon DnaK/J depletion is caused mainly by DnaA degradation.

**Figure S2. The effect of various protease mutations on DnaA steady-state levels in cells depleted of DnaK/J.** (A) Western blots showing DnaA and RpoA protein levels in the DnaK/J depletion strain and isogenic strains with mutations in *lon*, CCNA\_00108 (*lon-like*), *hslV*, *ftsH* or *clpA*. Cells were grown in PYE with xylose and shifted to PYE with glucose to deplete DnaK/J for the times indicated. (B) Western blots showing ClpP, DnaK, DnaA, and RpoA levels during simultaneous depletion of ClpP and DnaK/J. ClpP was pre-depleted for 3 hours (-IPTG) before cells were shifted to glucose to also deplete DnaK/J. (C) Western blots showing ClpX, DnaK, DnaA, and RpoA protein levels during simultaneous depletion of ClpX and DnaK/J. ClpX was depleted for 3 hours (-IPTG) before cells were shifted to glucose to also deplete DnaK/J.

**Figure S3. Effects of a ClpP depletion and a *lon* deletion on DnaA and CtrA stability.** (A) *In vivo* degradation assay showing the effect of a  $\Delta lon$  mutation on CtrA stability in the

DnaK/J depletion strain. Cells were grown in xylose, or in glucose for 5.5 hrs to deplete DnaK/J, before being treated with chloramphenicol to shutdown protein synthesis. Samples were taken at the times indicated and degradation of CtrA was monitored by Western Blotting. The band intensities from two independent experiments were quantified; means with standard deviations are shown. (B) *In vivo* degradation assays showing the effect of ClpP depletion on DnaA stability in the DnaK/J depletion strain. ClpP was depleted for 8 hrs until the protein level was reduced to ~5% initial levels (see Fig. S2). DnaK/J was depleted for 5 hrs. Means with standard deviations from two independent experiments are shown. (C) *In vivo* degradation assays showing the effect of ClpP depletion on CtrA stability in the DnaK/J depletion strain. CtrA stability was measured using the same samples as in Fig. S3B.

**Figure S4. The effect of allosteric activators on Lon degradation of DnaA, CtrA, SciP and CcrM.** (A) *In vitro* degradation assays showing that titin-I27<sup>CM</sup>-β20 does not stimulate CtrA degradation by Lon. CtrA (2 μM) was incubated with Lon<sub>6</sub> (0.1 μM) in the absence or presence of titin-I27<sup>CM</sup>-β20 (5 μM). Creatine kinase was added to all reactions shown in this figure to facilitate ATP regeneration. Asterisks indicate the positions of the proteins analyzed. (B) *In vitro* degradation assays showing the effect of casein on DnaA degradation by Lon. DnaA (1.5 μM) was incubated with Lon<sub>6</sub> (0.1 μM) in the absence or presence of casein (50 μg/ml). Graphs show stimulation of Lon<sub>6</sub> (0.1 μM) ATPase activity (left graph) in the presence of casein, fit to a cooperative hyperbolic activation curve, and degradation rates (right graph) of DnaA (1.5 μM) by Lon<sub>6</sub> (0.1 μM) in the presence of increasing concentrations of casein. (C) *In vitro* degradation assays indicating that Lon degradation of SciP is not allosterically regulated. The top gel shows degradation of SciP (2 μM) by Lon<sub>6</sub> (0.1 μM) in the absence or presence of titin-I27<sup>CM</sup>-β20 (5 μM). Note that SciP and titin-I27<sup>CM</sup>-β20 run at the same position. Given that titin-I27<sup>CM</sup>-β20 is rapidly degraded within less than 15 min (Fig. 5A), the data indicate that SciP degradation is not significantly

affected by titin-I27<sup>CM</sup>- $\beta$ 20. To better assess the effect of allosteric regulators on SciP degradation we also performed degradation assays with a  $\beta$ 20 peptide (middle gels).  $\beta$ 20 is a 20-residue peptide containing a Lon degron derived from misfolded  $\beta$ -galactosidase that was found to stabilize a high efficiency state of *E. coli* Lon (Gur and Sauer, 2009). Incubation of purified SciP (2  $\mu$ M) with Lon<sub>6</sub> (0.2  $\mu$ M) in the absence or presence of  $\beta$ 20 (50  $\mu$ g/ml) shows that addition of  $\beta$ 20 has no apparent effect on SciP degradation (upper gels). In contrast, addition of  $\beta$ 20 (50  $\mu$ g/ml) to a mixture of purified DnaA (1.5  $\mu$ M) and Lon<sub>6</sub> (0.1  $\mu$ M) clearly promoted DnaA degradation (lower gels). (D) *In vitro* degradation assays showing that Lon degradation of CcrM is only mildly stimulated by titin-I27<sup>CM</sup>- $\beta$ 20. The gels show degradation of CcrM (1  $\mu$ M) by Lon<sub>6</sub> (0.1  $\mu$ M) in the absence or presence of titin-I27<sup>CM</sup>- $\beta$ 20 (5  $\mu$ M). The intensities of the CcrM bands from three independent experiments were quantified and plotted. (E) Increased temperature or urea denaturation do not enhance DnaA degradation in the absence of allosteric activators. Left gel: DnaA (1.5  $\mu$ M) was incubated with Lon<sub>6</sub> (0.2  $\mu$ M) and degradation was measured at 40 °C. Middle gel: Denatured DnaA (1.5  $\mu$ M) (denatured by treatment with 6M urea for 6 hours) was incubated with Lon<sub>6</sub> (0.2  $\mu$ M) at 30 °C. Right gel: DnaA was incubated for 10 min at 45 °C prior to incubation with Lon<sub>6</sub> (0.2  $\mu$ M) at 30 °C.

**Figure S5. Heat shock results in decreased DnaA levels independent of the growth medium.** (A) DnaK, Lon, DnaA and RpoA levels measured by Western blots in wild type and a *P<sub>dnaKJ</sub>::Tn5* mutant grown in M2G medium and shifted to 40°C. (B) DnaK, Lon, DnaA and RpoA levels in wild type grown in PYE medium and shifted to 45°C.

## Supplemental Experimental Procedures

### Growth conditions

*C. crescentus* strains were grown in PYE (rich medium) or M2G medium (minimal medium), supplemented when necessary with 0.3% xylose, 0.2% glucose, 3% sucrose, 1000  $\mu\text{M}$  IPTG or 500 mM vanillate. Antibiotics were added in the following concentrations as needed for solid and liquid media, respectively: oxytetracycline (2  $\mu\text{g ml}^{-1}$  or 1  $\mu\text{g ml}^{-1}$ ), kanamycin (25  $\mu\text{g ml}^{-1}$  or 5  $\mu\text{g ml}^{-1}$ ), chloramphenicol (1  $\mu\text{g ml}^{-1}$  or 2  $\mu\text{g ml}^{-1}$ ) or spectinomycin (200  $\mu\text{g ml}^{-1}$  or 25  $\mu\text{g ml}^{-1}$ ). *E. coli* strains were routinely grown in LB medium at 37 °C, supplemented with chloramphenicol (30  $\mu\text{g ml}^{-1}$  or 20  $\mu\text{g ml}^{-1}$ ), kanamycin (50  $\mu\text{g ml}^{-1}$  or 30  $\mu\text{g ml}^{-1}$ ), oxytetracycline (12  $\mu\text{g ml}^{-1}$ ), or spectinomycin (50  $\mu\text{g ml}^{-1}$ ) as required. Canavanine was used at a final concentration of 100  $\mu\text{g ml}^{-1}$ . *Caulobacter* cultures were grown at 30 °C unless otherwise noted and diluted when necessary to maintain exponential growth. For heat shock experiments, 20 ml-cultures of *Caulobacter* were shifted from 30°C to an incubator pre-heated to 40 or 45°C, respectively, and samples were taken as indicated. Transductions were performed using  $\phi\text{Cr30}$  as described previously (Ely, 1991).

### Strain construction

Strain ML2017 was constructed by transducing *dnaA::\Omega (spec<sup>r</sup>)* from GM2471 into ML76 (CB15N) containing the *dnaA* overexpression plasmid pML1716-*dnaA* (Jonas et al., 2011). ML2017 is viable in the absence of xylose because the leaky expression of *P<sub>xyI</sub>-M2-dnaA* on the high copy plasmid pML1716-*dnaA* results in the accumulation of enough DnaA to allow replication initiation. Strains ML2009 and ML2008 were constructed by electroporating plasmids pCT155-*vanR-P<sub>van</sub>-dnaA* and pCT133-*P<sub>van</sub>-dnaA*, respectively, into SG400 (*P<sub>xyI</sub>-dnaKJ*). To construct strain ML2002 the *lon* gene was deleted using the two-step recombination procedure (Skerker et al., 2005). First, plasmid pNPTS-*UHR-*

*DHR(lon)* (*kan<sup>r</sup>*) was introduced into SG400 by electroporation. Clones that have integrated the vector at the *lon* locus were selected on PYE plates containing xylose, kanamycin and spectinomycin. A second recombination step was performed to select for plasmid excision. Single colonies of the first integrants were grown overnight in PYE containing xylose and spectinomycin. After overnight growth, 1  $\mu$ l was plated for counter-selection on PYE containing sucrose, xylose and spectinomycin. Sucrose resistant clones, which formed colonies after 2-3 days, were restreaked to test for loss of kanamycin resistance and hence plasmid excision. The resulting clones have either regenerated the wild-type allele or generated an in-frame deletion of *lon*. To distinguish between the two outcomes, PCR was performed using primers *lon\_test\_F* and *lon\_test\_R*. The *lon* deletion in strain ML2002 was further verified by DNA sequencing. Strains ML2003, ML2005, ML2004 were constructed similarly to ML2002, except that plasmid pNPTS-UHR-DHR(*clpA*), pNPTS-UHR-*tet*-DHR(*lon-like*) or pNPTS-UHR-*tet*-DHR(*ftsH*), respectively, was used for the first integration. For the construction of  $\Delta$ *ftsH*(*tet<sup>r</sup>*) and  $\Delta$ *lon-like*(*tet<sup>r</sup>*) the plasmid excision step was performed in the presence of tetracycline to prevent reversion to wild type alleles. The chromosomal deletions were verified by PCR using appropriate primers (see Table 2). Strain ML2006 was constructed by moving *hslV::Tn5* into SG400 by phage transduction and selecting for kanamycin resistance. The *hslV::Tn5* allele was selected in a previous unpublished study as a suppressor of allele conferring DNA damage sensitivity (ML2007). Tn5 is inserted in the beginning of the *hslV* gene, thus leading to a nearly complete disruption of the gene. PCR using primers *hslV\_test\_F* and *hslV\_test\_R* was performed to verify the transduction of the mutant allele. To construct the double depletion strains ML2014 and ML2015 the *P<sub>xyI</sub>-dnaKJ::spec* construct from SG400 was moved by phage transduction into strain ML2012 or ML2013 (kindly provided by C. Aakre), respectively. ML2012 contains a markerless deletion of *clpP* and a plasmid pCT133-*P<sub>lacI</sub>-lacI-P<sub>lac</sub>-clpP* allowing for the depletion of ClpP when growing cells in the absence of IPTG. Likewise, ML2013 contains a markerless deletion of *clpX* and the low-copy plasmid pCT133-*P<sub>lacI</sub>-*

*lacI-P<sub>lac</sub>-clpX*. Strain ML2010 was constructed by electroporating pML1716-*lon* into CB15N. Strains ML2022 and ML2023 were generated by electroporating pCT133-*vanR-P<sub>van</sub>-lon* into LS2382 or ML2002, respectively.

### **Expression plasmids**

Plasmid pCT133-*P<sub>van</sub>-dnaA* was constructed by first creating pENTR-*P<sub>van</sub>-dnaA* and subsequently recombining it into the destination vector pCT133, derived from the low copy vector pMR20, using the Gateway LR clonase (Invitrogen). pENTR-*P<sub>van</sub>-dnaA* was constructed by amplifying *P<sub>van</sub>* and *dnaA* using the primer pairs Pvan\_F/Pvan\_R and dnaA\_Pvan\_F/dnaA\_R, respectively from the *C. crescentus* chromosome. Both fragments were subsequently fused by PCR and cloned into pENTR using the pENTR/D-TOPO cloning system (Invitrogen). The resultant plasmid pENTR-*P<sub>van</sub>-dnaA* was subsequently used to generate pCT133-*P<sub>van</sub>-dnaA*. pENTR-*lon* was constructed by amplifying *lon* using primers lon\_F and lon\_R from the *C. crescentus* chromosome. The PCR fragment was cloned into pENTR and subsequently recombined into pML1716, yielding pML1716-*lon*. pENTR-*vanR-P<sub>van</sub>-lon* was constructed by amplifying *vanR-P<sub>van</sub>* and *lon* using the primer pairs Pvan\_F2/Pvan\_R and lon\_Pvan\_F/lon\_R, respectively from the *C. crescentus* chromosome. Both fragments were subsequently fused by PCR using primers Pvan\_F2 and lon\_R and cloned into pENTR. The *vanR-P<sub>van</sub>-lon* construct from pENTR-*vanR-P<sub>van</sub>-lon* was subsequently recombined into pCT133 using the Gateway LR clonase. For pET23b-HIS<sub>6</sub>Sumo-ccDnaA, *dnaA* was amplified with dnaA\_Sumo\_For and dnaA\_Sumo\_Rev, digested with *AgeI* and *NotI* and ligated with digested pET23bHIS<sub>6</sub>Sumo (Wang et al., 2007). All plasmids were sequence verified.

### **Integration plasmids**

The integration vector pNPTS-*UHR-DHR(lon)* was constructed by amplifying an upstream and downstream homology region (*UHR* and *DHR*, respectively) of *lon* by using the primer pairs UHR\_lon\_F/UHR\_lon\_R and DHR\_lon\_F/DHR\_lon\_R, respectively. In a second

PCR step, the PCR products *UHR* and *DHR* were fused using primers *UHR\_lon\_F* and *DHR\_lon\_R*. The resultant product *UHR-DHR(lon)* was digested with *HindIII* and *EcoRI* and cloned into the *HindIII-EcoRI*-digested and dephosphorylated integration vector pNPTS138 to yield pNPTS-*UHR-DHR(lon)*. Plasmid pNPTS-*UHR-DHR(clpA)* was constructed similarly to pNPTS-*UHR-DHR(lon)*, except using the primer pairs *UHR\_clpA\_F/UHR\_clpA\_R* and *DHR\_clpA\_F/DHR\_clpA\_R* for amplifying the upstream and downstream homology regions of *clpA*, respectively. Plasmid pNPTS-*UHR-tet-DHR(ftsH)* was constructed by amplifying an *UHR* and a *DHR* of *ftsH* using the primer pairs *UHR\_ftsH\_F/UHR\_ftsH-tet\_R* and *DHR\_ftsH-tet\_F/DHR\_ftsH\_R*, respectively. In a parallel reaction the tetracycline resistance cassette (*tet*) was amplified from plasmid pKO3 using primers *tet\_ol7\_F* and *tet\_ol8\_R*. In a next PCR step, the PCR products *UHR* and *DHR* were fused with the *tet* resistance cassette yielding fragments *UHR-tet* and *tet-DHR* using primer pairs *UHR\_ftsH\_F/tet\_ol8\_R* and *tet\_ol7\_F/DHR\_ftsH\_R*. Finally, the resulting PCR products *UHR-tet* and *tet-DHR* were fused by using primers *UHR\_ftsH\_F* and *DHR\_ftsH\_R*. The resultant PCR fragment *UHR-tet-DHR(ftsH)* was then cloned into pNPTS using the *BamHI* and *MluI* restriction sites. Plasmid pNPTS-*UHR-tet-DHR(lon-like)* was constructed similarly to pNPTS-*UHR-tet-DHR(ftsH)* except for using primer *UHR\_lon-like\_F*, *UHR\_lon-like-tet\_R*, *DHR\_lon-like-tet\_F* and *DHR\_lon-like\_R*.

### **Flow cytometry**

Samples from *Caulobacter* cultures grown under the appropriate conditions were fixed in 70% ethanol. Fixed cells were pelleted at 4000 rpm, resuspended in 50 mM sodium citrate buffer containing 2 µg/ml RNase and incubated for 4 hrs at 50°C to digest RNA. Samples were diluted and stained with 2.5 µM SYTOX green before being analyzed by flow cytometry using a BD Accuri C6 flow cytometer (BD biosciences). Data were collected for 50000 cells using the FL-2 detector. Data were analyzed using BD accuri software. Each experiment was repeated independently and representative results are shown.



## **Microscopy**

Cells were fixed with 0.5% paraformaldehyde, pelleted, and resuspended in an appropriate volume of PBS. Fixed cells were mounted onto PYE 1.2% agarose pads and imaged using an Axiovert 200 microscope (Zeiss) with a 63×/1.4 NA objective (Zeiss) using software from Metamorph (Universal Imaging, PA). Cells examined were in mid-exponential phase.

## **Immunoblotting**

Pelleted cells, normalized to the optical density of the culture, were resuspended in 1X SDS sample buffer and heated to 95°C for 10 min. Equal amounts of total protein were then subject to SDS-PAGE for 60 min at 150 V at room temperature on 10% or Tris-HCl gels (Bio-Rad) and transferred to PVDF membranes (Bio-Rad). Proteins were detected using primary antibodies against DnaA (Taylor et al., 2011), DnaK (Baldini et al., 1998), RpoA, CtrA, *E. coli* Lon (kindly provided by R.T. Sauer), or the M2-tag, as appropriate, and a 1:5000 dilution of secondary HRP-conjugated antibody. Blots were scanned with a Typhoon scanner (GE Healthcare), images were processed with Adobe Photoshop, and the relative band intensities were quantified with ImageJ software.

### **<sup>35</sup>S-pulse labeling**

*Caulobacter* cultures grown to OD<sub>600</sub> 0.15 were pulse-labeled with 10 μCi of [<sup>35</sup>S]-methionine per ml of culture for 10 min. Cells were pelleted and snap frozen in liquid nitrogen. Cell pellets were resuspended in SDS buffer (10 mM Tris pH 8, 1% SDS, 1 mM EDTA) and boiled for 5 min before being pre-cleared in wash buffer (50 mM Tris pH 8, 150 mM NaCl, 0.5% Triton X-100) with 15 μl protein A-agarose (Roche Diagnostics). Pre-cleared protein extracts were incubated overnight with DnaA or RpoA antiserum (1:1000 dilution). Bound proteins were immunoprecipitated with 15 μl protein A-agarose, washed three times with wash buffer and resuspended in SDS loading buffer, boiled for 5 min and resolved by SDS-PAGE. Gels were dried, exposed to Phosphorimager screens and scanned with a Typhoon scanner (GE Healthcare).

### **Protein purification and modification**

Lon protease and His<sub>6</sub>-tagged titin<sup>I27</sup>-β20 were purified as previously described (Gora et al., 2013; Gur and Sauer, 2008), with an additional ion-exchange step (MonoQ) for Lon. Purified titin<sup>I27</sup>-β20 was carboxymethylated with 10 mM sodium iodoacetate, 6 M guanidine HCL and 25 mM Tris pH 8.0. After modification, the protein was exchanged in 25 mM Tris (pH 8.0) buffer and stored at 4 °C. DnaA was produced by expressing a His<sub>6</sub> tagged SUMO-DnaA fusion, purifying this construct via Ni-NTA agarose, removal of the tagged SUMO portion with Ulp1 protease, and a second subtractive Ni-NTA passage as described (Wang et al., 2007) in buffer A (200 mM L-glutamic acid potassium salt, 10 mM magnesium acetate, 20% sucrose, 1 mM dithiothreitol) with either 10 mM or 300 mM imidazole. Cleaved DnaA was further purified using cation exchange (MonoS) chromatography. The β20 peptide (QLRSLNGEWRFAWFPAPEAV) was a gift from R. T. Sauer.

## Degradation and ATPase assays

To measure protein degradation *in vivo*, cells were grown under the desired conditions. Protein synthesis was blocked by addition of 100 µg/ml chloramphenicol. Samples were taken every 10 min and snap frozen in liquid nitrogen before being analyzed by Western blotting.

ATP hydrolysis by Lon (0.1 µM Lon<sub>6</sub>) was measured using a NADH/pyruvate kinase coupled system at 30°C with the following conditions: 0.2 mM NADH, 5 mM phosphoenol pyruvate and 0.1% pyruvate kinase/lactate dehydrogenase mix (PK/LDH Sigma P0294) in Lon reaction buffer (100 mM KCl, 10 mM MgCl<sub>2</sub>, 1 mM DTT and 25 mM Tris, pH 8.0). *In vitro* degradation assays were performed in Lon degradation buffer at 30°C with 75 µg/ml creatine kinase, 15 mM creatine phosphate and 4 mM ATP and concentrations of Lon<sub>6</sub>, DnaA, titin-I27<sup>CM</sup>-β20, CtrA, SciP or β20 as indicated in figure legends. Samples were taken at appropriate time points, quenched with SDS loading dye and snap frozen in liquid nitrogen. Samples were heated at 65°C for 5 minutes, separated by SDS-PAGE, and proteins detected by Coomassie Blue G-250 staining. DnaA degradation rates were calculated based on quantification of protein band intensity following scanning of stained gels by ImageJ and plotted against titin-I27<sup>CM</sup>-β20 concentration.

## Fitting of ATPase/degradation curves

In Figure 5B and S4A, the ATPase activity of Lon was fit to a hyperbolic cooperative activation equation (Eq 1);

$$\text{ATPase rate} = \frac{V_{\text{ATPase,max}} [\text{substrate}]^n}{K_{0.5}^n + [\text{substrate}]^n} \quad (1)$$

with fitted parameters:  $n = 3.04 \pm 0.07$ ,  $V_{\text{ATPase,max}} = 360.43 \pm 2.89 \text{ Lon}^{-1} \text{ min}^{-1}$ ,  $K_{0.5} = 13.9 \pm 0.14 \text{ µM}$  for titin-I27<sup>CM</sup>-β20 stimulation (Figure 5B) and  $n = 0.9 \pm 0.09$ ,  $V_{\text{ATPase,max}} = 169 \pm 10.71 \text{ Lon}^{-1} \text{ min}^{-1}$ ,  $K_{0.5} = 23.9 \pm 4.39 \text{ µM}$  for casein stimulation (Figure S4A).

In Figure 5C, the DnaA degradation by Lon was fit assuming a cooperative activation of DnaA degradation based on the cooperative ATPase activation from equation (1) and inhibition that stems from the amount of unoccupied Lon (amount of Lon not bound by the carboxymethylated titin substrate) at high concentrations (Eq 2):

$$\text{DnaA degradation rate} = \frac{V_{\text{DnaA deg,max}} [\text{substrate}]^n}{K_{\text{activation}}^n + [\text{substrate}]^n} * \left(1 - \frac{[\text{substrate}]^n}{K_{\text{competition}}^n + [\text{substrate}]^n}\right) \quad (2)$$

We used a Hill coefficient (n=3) derived from the ATPase stimulation experiment, assuming stimulation of ATP hydrolysis is coincident with DnaA degradation activation and fit the remaining parameters to yield,  $K_{\text{activation}} = 2.09 \pm 0.44 \mu\text{M}$ ,  $V_{\text{DnaA deg,max}} = 2.26 \pm 0.87 \text{ Lon}^{-1} \text{ min}^{-1}$  and  $K_{\text{competition}} = 8 \pm 6.03 \mu\text{M}$ .

### Identification of *dnaA* overexpression suppressors

Strain ML2017 (CB15N *dnaA::Ω* + p*P<sub>xyI</sub>-M2-dnaA*) was grown to late exponential phase, spread on PYE plates containing xylose, chloramphenicol and spectinomycin, incubated at 30°C, and monitored over 3 days. Small colonies were picked and restreaked on PYE plates containing chloramphenicol, spectinomycin, and either glucose or xylose. Putative suppressors were grown in liquid media overnight containing xylose, chloramphenicol and spectinomycin, and then frozen at -80°C. Plasmid DNA was isolated and transformed into wild type to test if induction of *P<sub>xyI</sub>-M2-dnaA* still resulted in lethality. Plasmids that no longer led to lethality were inferred to contain mutations within the plasmid-borne *dnaA*, which were identified by sequencing the *P<sub>xyI</sub>-M2-dnaA* construct using primers M13For, M13Rev and *dnaA\_For*. Suppressors with plasmids that could still induce lethality were expected to contain chromosomal suppressor mutations. Genomic DNA was isolated from 10 of these candidates and prepared for Illumina whole genome re-sequencing. The

remaining suppressor mutations were identified by directly sequencing *dnaK*, *dnaJ*, and *grpE* using appropriate primers.

### **Identification of suppressors of DnaK/J depletion**

Strain SG400 was streaked from the frozen stock on PYE plates containing glucose and spectinomycin, incubated at 30 °C, and monitored over 3 days. Small colonies were picked and restreaked on plates containing glucose or xylose. The suppressor strains were grown up in PYE with glucose overnight, frozen at -80°C, and sampled for Western blotting to verify absence of DnaK/J. Only clones in which DnaK was depleted to levels comparable to the parental strain SG400 were used for further investigation. Genomic DNA was isolated from these clones and analyzed by Illumina whole genome re-sequencing.

### **DNA microarrays**

RNA was collected from bacteria in exponential phase that were grown under the appropriate conditions and extracted using the RNeasy mini kit (Qiagen). The generation of labeled cDNA and hybridization of custom Agilent arrays was performed as earlier described (Gora et al., 2010).

### **Illumina sequencing and data analysis**

Genomic DNA was isolated using the Qiakit, according to the manufacturer's protocol (Qiagen). DNA concentration and quality were assessed using the NanoDrop ND-1000 UV-Vis Spectrophotometer (NanoDrop Technologies). Illumina sequencing, including sample preparation, was performed at the MIT BioMicro Center. Illumina libraries were generated from intact genomic DNA using the Nextera protocol. Up to ten samples were multiplexed in one lane in a 40 nts single read flow cell using the HiSeq 2000 platform. SNP calling was performed using SAMtools following earlier protocols (Li et al., 2009). Directed gene sequencing verified the mutations identified.

**Supplemental Table 1 – Suppressor mutations**

| Suppressor mutant | Mutation                                      | Genome location | Amino acid substitution        |
|-------------------|-----------------------------------------------|-----------------|--------------------------------|
| <b>DnaA</b>       |                                               |                 |                                |
| A_19              | ATC → ACC                                     | plasmid         | DnaA(I399T)                    |
| A_50              | GTG → GAG                                     | plasmid         | DnaA(V426E)                    |
| B_71              | GTG → GAG                                     | plasmid         | DnaA(V426E)                    |
| F_3               | GCC → ACC                                     | plasmid         | DnaA(A407T)                    |
| F_14              | ATC → GTC                                     | plasmid         | DnaA(I448V)                    |
| <b>DnaK</b>       |                                               |                 |                                |
| B_6               | ACC → GCC                                     | A9356G          | DnaK T398A                     |
| B_9               | GTT → GAT                                     | T9279A          | DnaK V372D                     |
| B_21              | GAA → GGA                                     | A9255G          | DnaK E364G                     |
| B_22              | ACC → GCC                                     | A9356G          | DnaK T398A                     |
| B_26              | FS: CAG GCC → CAG TGC CAA                     | 9655 (+T)       | DnaK 497                       |
| B_27              | FS: AAG GCT GCG → AAG TGC G                   | 9719 (-GC)      | DnaK 519                       |
| B_33              | FS: CAG GCC → CAG TGC CAA                     | 9655 (+T)       | DnaK 497                       |
| B_35              | ACC → GCC                                     | A9356G          | DnaK T398A                     |
| B_40              | ACC → GCC                                     | A9356G          | DnaK T398A                     |
| B_45              | AAC → AAG                                     | C8815G          | DnaK N217K                     |
| B_56              | GGC → GAC                                     | G8376C          | DnaK G74D                      |
| B_57              | AAC → AGC                                     | A9501G          | DnaK N446S                     |
| B_65              | GAC → TAC                                     | G9578T          | DnaK D472Y                     |
| B_68              | ACC → GCC                                     | A9356G          | DnaK T398A                     |
| B_78              | GAC → AAC                                     | G8186A          | DnaK D8N                       |
| B_85              | CGC → GGC                                     | C8330G          | DnaK R56G                      |
| B_7               | GAG → GTG                                     | A8838T          | DnaK E225V                     |
| B_20              | CGC → CCC                                     | G8385A          | DnaK R71P                      |
| E_51              | 51 bp duplication                             | 9046 (+51)      | DnaK 294                       |
| D_8               | GAC → GGC                                     | A9618G          | DnaK D485G                     |
| C_22              | CAG → CGG                                     | A9447G          | DnaK Q428R                     |
| C_15              | CTG → ATG                                     | C9317A          | DnaK L385M                     |
| E_9               | <i>P<sub>dnaK</sub></i> (-199): TATCC → TAGCC | T7966G          | <i>P<sub>dnaK</sub></i> (-199) |
| D_48              | GGC → GCC                                     | G8193C          | DnaK G10A                      |
| D_9               | ACC → TCC                                     | A8195T          | DnaK T11S                      |
| <b>DnaJ</b>       |                                               |                 |                                |
| B_86              | FS: GGC CAG GTG → GGC CAT GGT                 | 10848 (+T)      | DnaJ 209                       |
| D_12              | FS: GGC CAG GTG → GGC CAT GGT                 | 10848 (+T)      | DnaJ 209                       |
| E_45              | FS: GGC CAG GTG → GGC CAT GGT                 | 10848 (+T)      | DnaJ 209                       |
| C_32              | FS: CCC CAG CGC → CCC AGC GCG                 | 10568 (-C)      | DnaJ 116                       |
| <b>GrpE</b>       |                                               |                 |                                |
| D_42              | CCC → CTC                                     | C162899T        | GrpE P164L                     |

**Supplemental Table 2 - Strains and Plasmids**

| <b>Name</b>                                               | <b>Genotype/description</b>                                                                          | <b>Source</b>               |
|-----------------------------------------------------------|------------------------------------------------------------------------------------------------------|-----------------------------|
| <b><i>C. crescentus</i> strains</b>                       |                                                                                                      |                             |
| CB15N                                                     | Synchronizable derivative of wild-type CB15                                                          | (Evinger and Agabian, 1977) |
| ML2017                                                    | CB15N <i>dnaA::Ω(spec<sup>r</sup>)</i> , pML1716- <i>dnaA</i>                                        | This study                  |
| SG400                                                     | <i>P<sub>xyl</sub>-dnaK-dnaJ(spec<sup>r</sup>)</i>                                                   | (da Silva et al., 2003)     |
| ML2002                                                    | SG400 Δ <i>lon</i>                                                                                   | This study                  |
| ML2003                                                    | SG400 Δ <i>clpA</i>                                                                                  | This study                  |
| ML2004                                                    | SG400 Δ <i>ftsH(tet<sup>r</sup>)</i>                                                                 | This study                  |
| ML2005                                                    | SG400 Δ <i>CCNA_00108(tet<sup>r</sup>)</i>                                                           | This study                  |
| ML2006                                                    | SG400 <i>hslV::Tn5</i>                                                                               | This study                  |
| ML2007                                                    | CB15N <i>hslV::Tn5</i>                                                                               | Lab strain collection       |
| ML2008                                                    | SG400 pCT133- <i>P<sub>van</sub>-dnaA</i>                                                            | This study                  |
| ML2009                                                    | SG400 pCT155- <i>vanR-P<sub>van</sub>-dnaA</i>                                                       | This study                  |
| ML2010                                                    | CB15N pML1716- <i>lon</i>                                                                            | This study                  |
| ML2012                                                    | Δ <i>clpP</i> , pCT133- <i>P<sub>lacI</sub>-lacI-P<sub>lac</sub>-clpP</i>                            | Lab strain collection       |
| ML2013                                                    | Δ <i>clpX</i> , pCT133- <i>P<sub>lacI</sub>-lacI-P<sub>lac</sub>-clpX</i>                            | Lab strain collection       |
| ML2014                                                    | ML2012 <i>P<sub>xyl</sub>-dnaK-dnaJ(spec<sup>r</sup>)</i>                                            | This study                  |
| ML2015                                                    | ML2013 <i>P<sub>xyl</sub>-dnaK-dnaJ(spec<sup>r</sup>)</i>                                            | This study                  |
| ML2016                                                    | CB15N <i>P<sub>dnaK</sub>::Tn5</i> (-66)                                                             | Lab strain collection       |
| LS2382                                                    | CB15N Δ <i>lon(spec<sup>r</sup>)</i>                                                                 | (Wright et al., 1996)       |
| ML2022                                                    | LS2382 pCT133- <i>vanR-P<sub>van</sub>-lon</i>                                                       | This study                  |
| ML2023                                                    | ML2002 pCT133- <i>vanR-P<sub>van</sub>-lon</i>                                                       | This study                  |
| <b><i>E. coli</i> strains</b>                             |                                                                                                      |                             |
| EPC517                                                    | BL21DE3 pLysS pET23b-HIS <sub>6</sub> Sumo-ccDnaA                                                    | This study                  |
| EPC460                                                    | W3110 Δ <i>lon</i> pBAD-ccLon                                                                        | (Gora et al., 2013)         |
| DH5α                                                      | General cloning strain                                                                               | Invitrogen                  |
| TOP10                                                     | General cloning strain                                                                               | Invitrogen                  |
| <b>General purpose vectors</b>                            |                                                                                                      |                             |
| pENTR/D-TOPO                                              | ENTRY vector for Gateway cloning system ( <i>kan<sup>R</sup></i> )                                   | Invitrogen                  |
| pCT155                                                    | Destination vector of pJS14, high-copy plasmid ( <i>chlor<sup>R</sup></i> )                          | Lab plasmid collection      |
| pCT133                                                    | Destination vector of pMR20, low copy plasmid ( <i>tet<sup>R</sup></i> )                             | Lab plasmid collection      |
| pML1716                                                   | Destination vector of pJS14; high-copy, <i>P<sub>xyl</sub></i> , M2 tag ( <i>chlor<sup>R</sup></i> ) | Lab plasmid collection      |
| pNPTS138                                                  | Integration vector                                                                                   | Lab plasmid collection      |
| pKO3                                                      | Template for amplifying a <i>tet</i> resistance cassette                                             | Lab plasmid collection      |
| <b>Plasmids</b>                                           |                                                                                                      |                             |
| pENTR- <i>lon</i>                                         | pENTR containing the <i>lon</i> open reading frame                                                   | This study                  |
| pENTR- <i>P<sub>van</sub>-dnaA</i>                        | pENTR containing <i>P<sub>van</sub></i> fused to <i>dnaA</i>                                         | This study                  |
| pCT155- <i>vanR-P<sub>van</sub>-dnaA</i>                  | pCT155 containing <i>dnaA</i> behind <i>vanR-P<sub>van</sub></i>                                     | (Jonas et al., 2011)        |
| pCT133- <i>P<sub>van</sub>-dnaA</i>                       | pCT133 containing <i>dnaA</i> behind <i>P<sub>van</sub></i>                                          | This study                  |
| pNPTS-UHR-DHR( <i>lon</i> )                               | for generation of a markerless in-frame deletion of <i>lon</i>                                       | This study                  |
| pNPTS-UHR-DHR( <i>clpA</i> )                              | for generation of a markerless in-frame deletion of <i>clpA</i>                                      | This study                  |
| pNPTS-UHR- <i>tet</i> -DHR( <i>ftsH</i> )                 | for generation of a <i>tet</i> marked in-frame deletion of <i>ftsH</i>                               | This study                  |
| pNPTS-UHR- <i>tet</i> -DHR( <i>lon-like</i> )             | for generation of a <i>tet</i> marked in-frame deletion of <i>CCNA_00108</i>                         | This study                  |
| pCT133- <i>P<sub>lacI</sub>-lacI-P<sub>lac</sub>-clpP</i> | pCT133 containing <i>P<sub>lacI</sub>-lacI-P<sub>lac</sub>-clpP</i>                                  | Lab plasmid collection      |
| pCT133- <i>P<sub>lacI</sub>-lacI-P<sub>lac</sub>-clpX</i> | pCT133 containing <i>P<sub>lacI</sub>-lacI-P<sub>lac</sub>-clpX</i>                                  | Lab plasmid collection      |
| pML1716- <i>lon</i>                                       | pML1716 containing <i>lon</i>                                                                        | This study                  |
| pCT133- <i>vanR-P<sub>van</sub>-lon</i>                   | pCT133 containing <i>lon</i> behind <i>vanR-P<sub>van</sub></i>                                      | This study                  |
| pML1716- <i>dnaA</i>                                      | pML1716 containing <i>dnaA</i>                                                                       | (Jonas et al., 2011)        |
| pET23b-HIS <sub>6</sub> Sumo-ccDnaA                       | Expression vector for purification of HIS <sub>6</sub> Sumo-ccDnaA                                   | This study                  |
| pBAD-ccLon                                                | Expression vector for purification of Lon                                                            | (Gora et al., 2013)         |
| pSH21-HIS6-titin-I27-β20                                  | Expression vector for purification of HIS6-titin-I27-β20                                             | (Gur and Sauer, 2008)       |

### Supplemental Table 3 - Primers

| Primers            | Sequence (5' → 3')                                |
|--------------------|---------------------------------------------------|
| lon_F              | CACCATGTCCGAACTACGTACGC                           |
| lon_R              | TTAGTGCGTCAGCATGGC                                |
| Pvan_F             | CACCGATCAAGGCGACGAACCGC                           |
| dnaA_Pvan_F        | CACGATGCGAGGAAACGACGATGACCATGAAGGGCGGGGTTGC       |
| dnaA_R             | CAATCCTACGATACGGTTTCG                             |
| dnaA_Sumo_For      | TATTTAACCGGTGGTATGACCATGAA                        |
| dnaA_Sumo_Rev      | ATAT ATGCGGCCGCTTAGCCCCGAG                        |
| UHR_lon_F          | CAGCAGAAGCTTACGCTCTGCATCAGGTGG                    |
| UHR_lon_ml_R       | GTCAGCATGGCGTGCCTGTACGTAGTTCGGACATGTTCTCAATAC     |
| DHR_lon_ml_F       | AGAACATGTCCGAACTACGTGACAGCGACGCCATGCTG            |
| DHR_lon_R          | CAGCAGGAATTCGTGGCGAGTGAGGGGATC                    |
| lon_test_F         | TCGGCCTGACCTTACC                                  |
| lon_test_R         | CACTCGCTATCGATAGGGAG                              |
| UHR_clpA_F         | CAGCAGAAGCTTCTGCGCGGCAAGTTCG                      |
| UHR_clpA_ml_R      | GCCATGGCCGGTTCGGTCTCCGAAAAAGAGGGCAACGGG           |
| DHR_clpA_ml_F      | CCCCGTTGCCCTCTTTTTCGGAGACCGAACCGGCCATG            |
| DHR_clpA_R         | CAGCAGGAATTCGGTTACGAGGGCGAGGCG                    |
| clpA_test_F        | CCTGAAGAGCGAAACCGCC                               |
| clpA_test_R        | TGCACTTCCACGTCATCCC                               |
| tet_ol7_F          | CGGTATCGATAAGCTTGATATCG                           |
| tet_ol8_R          | CTGCAGGAATTCAAGAAGTTC                             |
| UHR_ftsH_F         | CAGCAGGGATCCGGCCTTGCTCTGCGCCAG                    |
| UHR_ftsH_tet_R     | TATCAAGCTTATCGATACCGGTTTCTGAAATTCATACGCCTTGTCTTCC |
| DHR_ftsH_tet_F     | AACTTCTTGAATTCCTGCAGGCCAGCGTCACCGCCTGAC           |
| DHR_ftsH_R         | CAGCAGACGCGTTGCACAGGACCAGGACGCC                   |
| ftsH_test_F        | GCCGGTGAGAGAGTCGCC                                |
| ftsH_test_R        | CTGATAGCGACGCTCGTCGG                              |
| UHR_lon-like_F     | CAGCAGGGATCCGACGCCTTCCAGGGCGC                     |
| UHR_lon-like_tet_R | TATCAAGCTTATCGATACCGGTAGGCCACCGGCATCCAAG          |
| DHR_lon-like_tet_F | AACTTCTTGAATTCCTGCAGGATGACGAACCGACTTCGATCC        |
| DHR_lon-like_R     | CAGCAGACGCGTCCACGGCGAAGACATCG                     |
| lon-like_test_F    | CCTTTGTCGACGGCCGG                                 |
| lon-like_test_R    | GCCGAAGTGCTGGTCGAG                                |
| dnaA_F             | CACCTTGACCATGAAGGGCGGGGTTGC                       |
| dnaK_F             | CACCATGAGCAAGATTATCGGTATCGACC                     |
| dnaK_R             | GCATGACTCGCTTAAGCCG                               |
| dnaK_int_F         | AAATCGGCGATGGCGTCTTC                              |
| dnaK_int_R         | CGACTTCGTCAGGGTTCACG                              |
| dnaK_UHR_F         | CACCATGACGATCGACATACCGATAGCC                      |
| dnaJ_F             | CACCATGCGCGACTATTACGAAATTCTC                      |
| dnaJ_R             | TGGAACGGGAAGCCCTAGC                               |
| grpE_F             | CACCATGACCGACGAGCAAACG                            |
| grpE_R             | GATCAGGCCTTGGCGTC                                 |
| hsIV_F             | GCGCCCGTGATCAGCTTC                                |
| hsIV_R             | CTTTCCTCGGCGATCAGG                                |
| Pvan_F2            | CACCGACTGGTTCACACCTAAAGCG                         |
| Lon_Pvan_for       | CACGATGCGGCGAGGAAACGACGATGTCCGAACTACGTACGC        |



## Supplemental References

- Baldini, R.L., Avedissian, M., and Gomes, S.L. (1998). The CIRCE element and its putative repressor control cell cycle expression of the *Caulobacter crescentus* groESL operon. *J Bacteriol* 180, 1632-1641.
- da Silva, A.C., Simao, R.C., Susin, M.F., Baldini, R.L., Avedissian, M., and Gomes, S.L. (2003). Downregulation of the heat shock response is independent of DnaK and sigma32 levels in *Caulobacter crescentus*. *Mol Microbiol* 49, 541-553.
- Ely, B. (1991). Genetics of *Caulobacter crescentus*. *Methods Enzymol* 204, 372-384.
- Evinger, M., and Agabian, N. (1977). Envelope-associated nucleoid from *Caulobacter crescentus* stalked and swarmer cells. *J Bacteriol* 132, 294-301.
- Gora, K.G., Cantin, A., Wohlever, M., Joshi, K.K., Perchuk, B.S., Chien, P., and Laub, M.T. (2013). Regulated proteolysis of a transcription factor complex is critical to cell cycle progression in *Caulobacter crescentus*. *Mol Microbiol*. [Epub ahead of print]
- Gora, K.G., Tsokos, C.G., Chen, Y.E., Srinivasan, B.S., Perchuk, B.S., and Laub, M.T. (2010). A cell-type-specific protein-protein interaction modulates transcriptional activity of a master regulator in *Caulobacter crescentus*. *Mol Cell* 39, 455-467.
- Gur, E., and Sauer, R.T. (2008). Recognition of misfolded proteins by Lon, a AAA(+) protease. *Genes Dev* 22, 2267-2277.
- Gur, E., and Sauer, R.T. (2009). Degrons in protein substrates program the speed and operating efficiency of the AAA+ Lon proteolytic machine. *Proc Natl Acad Sci U S A* 106, 18503-18508.
- Jonas, K., Chen, Y.E., and Laub, M.T. (2011). Modularity of the bacterial cell cycle enables independent spatial and temporal control of DNA replication. *Curr Biol* 21, 1092-1101.
- Li, H., Handsaker, B., Wysoker, A., Fennell, T., Ruan, J., Homer, N., Marth, G., Abecasis, G., and Durbin, R. (2009). The Sequence Alignment/Map format and SAMtools. *Bioinformatics* 25, 2078-2079.
- Skerker, J.M., Prasol, M.S., Perchuk, B.S., Biondi, E.G., and Laub, M.T. (2005). Two-component signal transduction pathways regulating growth and cell cycle progression in a bacterium: a system-level analysis. *PLoS Biol* 3, e334.
- Taylor, J.A., Ouimet, M.C., Wargachuk, R., and Marczyński, G.T. (2011). The *Caulobacter crescentus* chromosome replication origin evolved two classes of weak DnaA binding sites. *Mol Microbiol* 82, 312-326.
- Wang, K.H., Sauer, R.T., and Baker, T.A. (2007). ClpS modulates but is not essential for bacterial N-end rule degradation. *Genes Dev* 21, 403-408.
- Wright, R., Stephens, C., Zweiger, G., Shapiro, L., and Alley, M.R. (1996). *Caulobacter* Lon protease has a critical role in cell-cycle control of DNA methylation. *Genes Dev* 10, 1532-1542.
