# Supplementary material
Source: PubMed Central journal article supplement (PMC3749246)

Figure S1

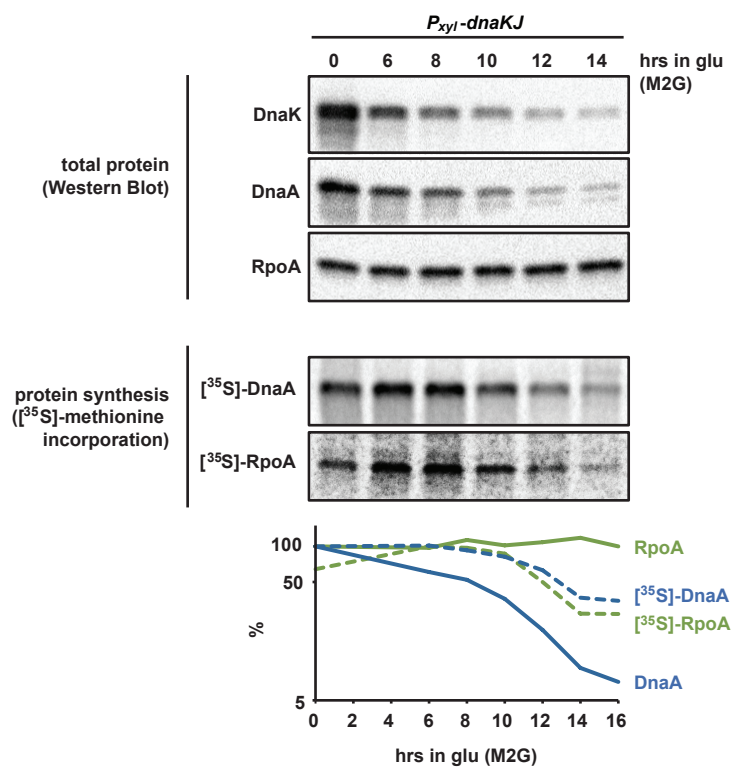

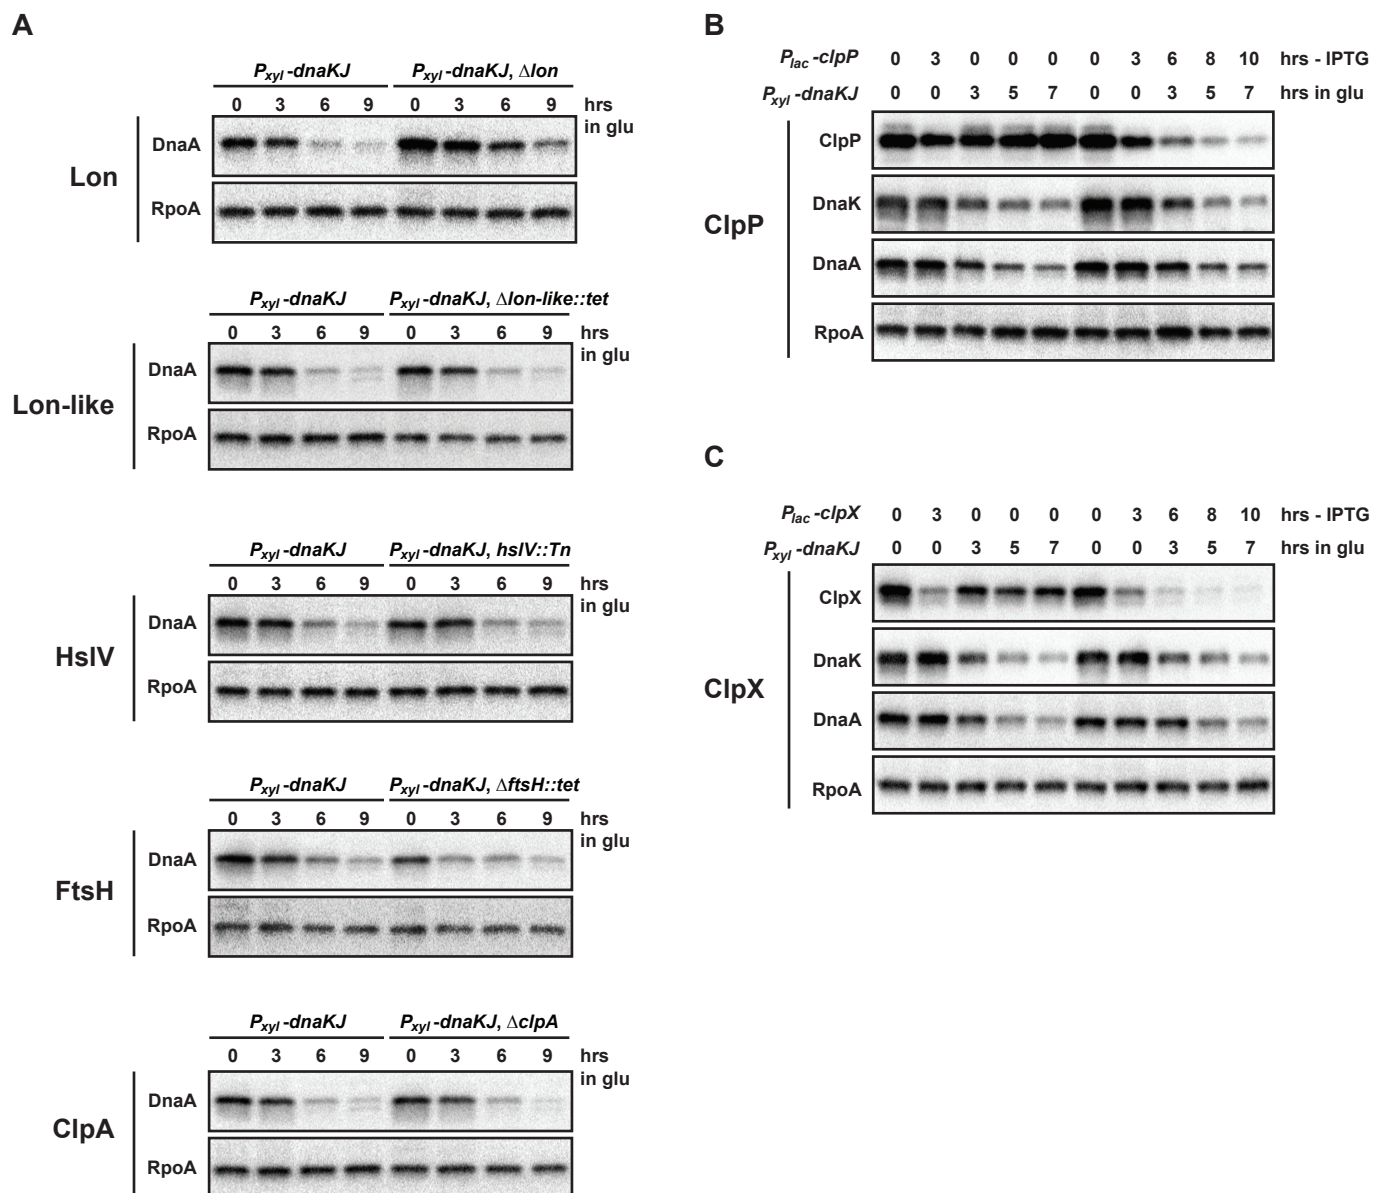

Figure S3

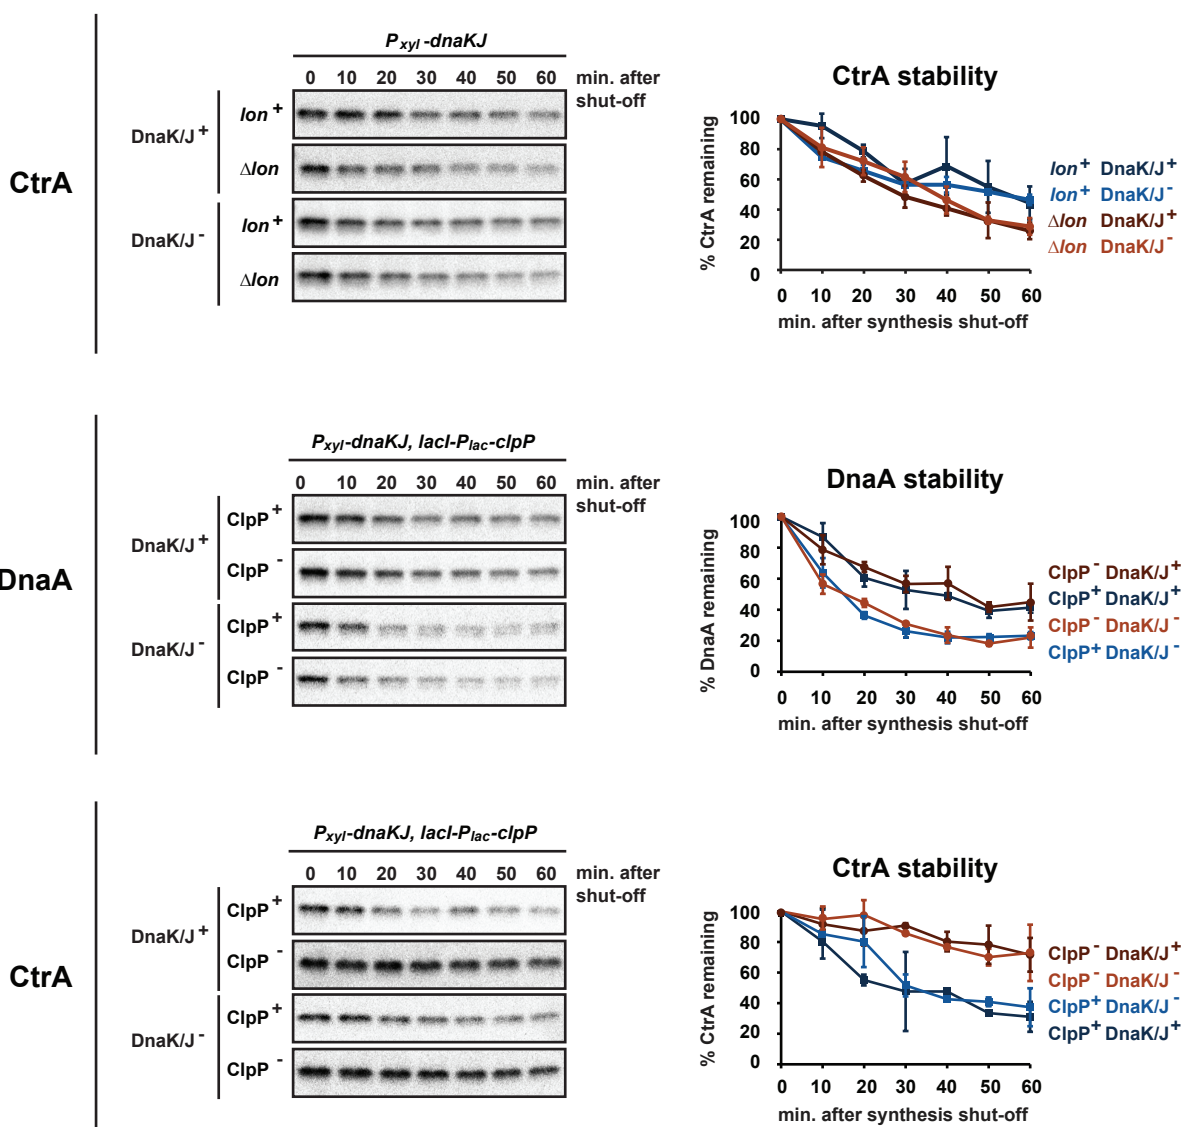

Figure S4

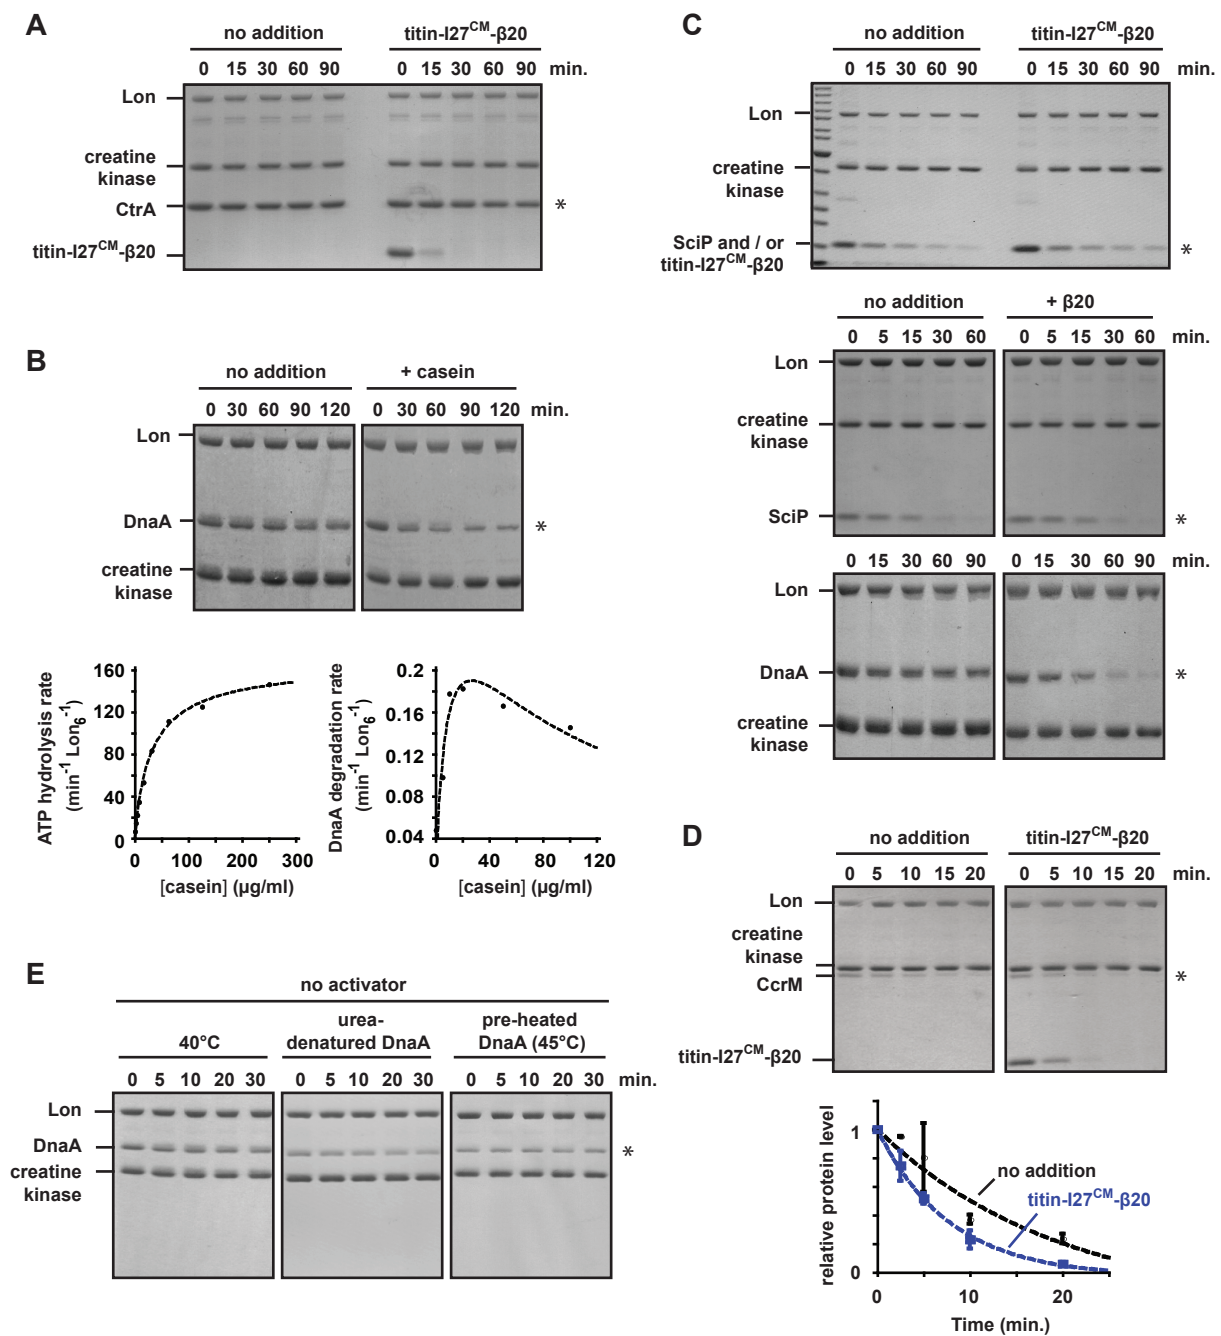

Figure S5

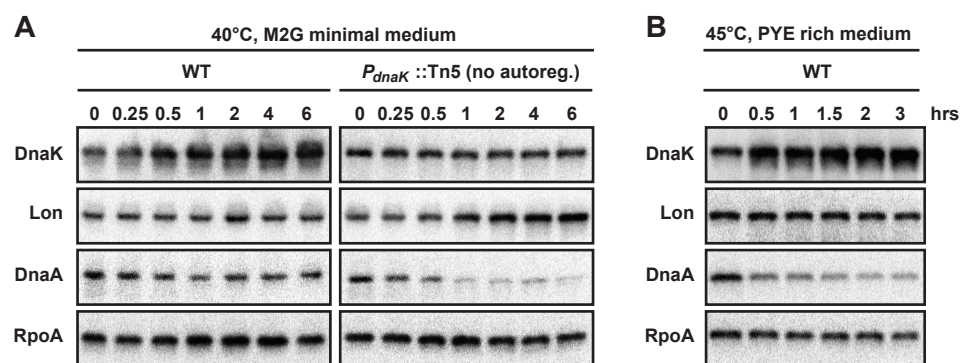

Supplement: NIHMS501019-supplement-02.pdf [file NIHMS501019-supplement-02.pdf]
